# Supplementary material for: Genetic dissection of 26 meat cut, meat quality and carcass traits in four pig populations
Source: PubMed Central journal article supplement (PMC10311868; doi:10.1186/s12711-023-00817-y), 2023-06-29

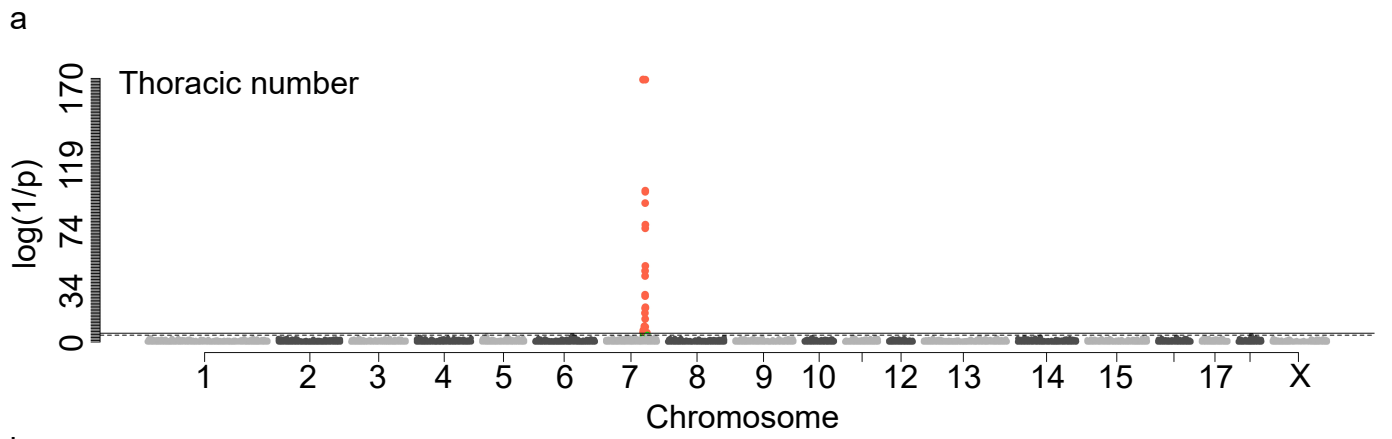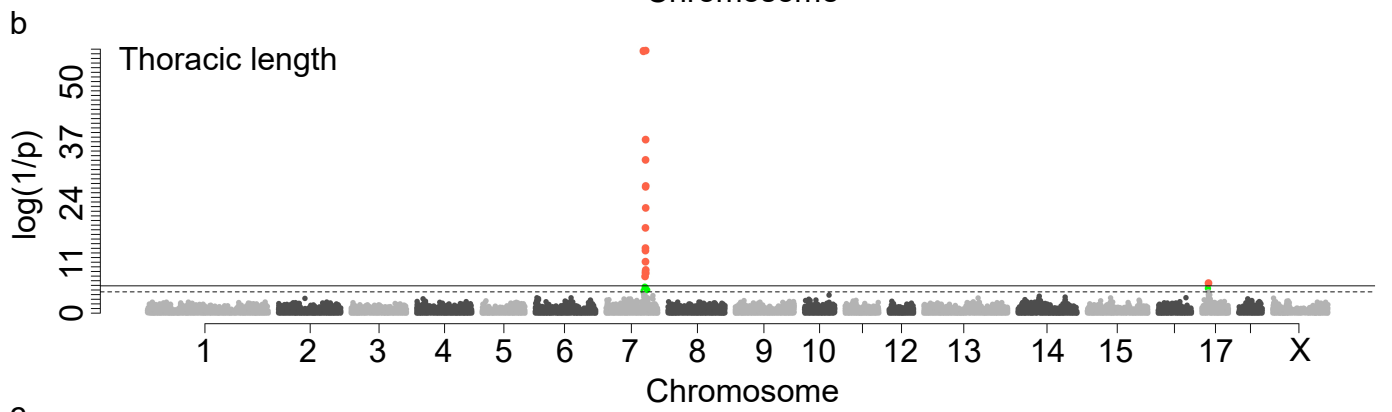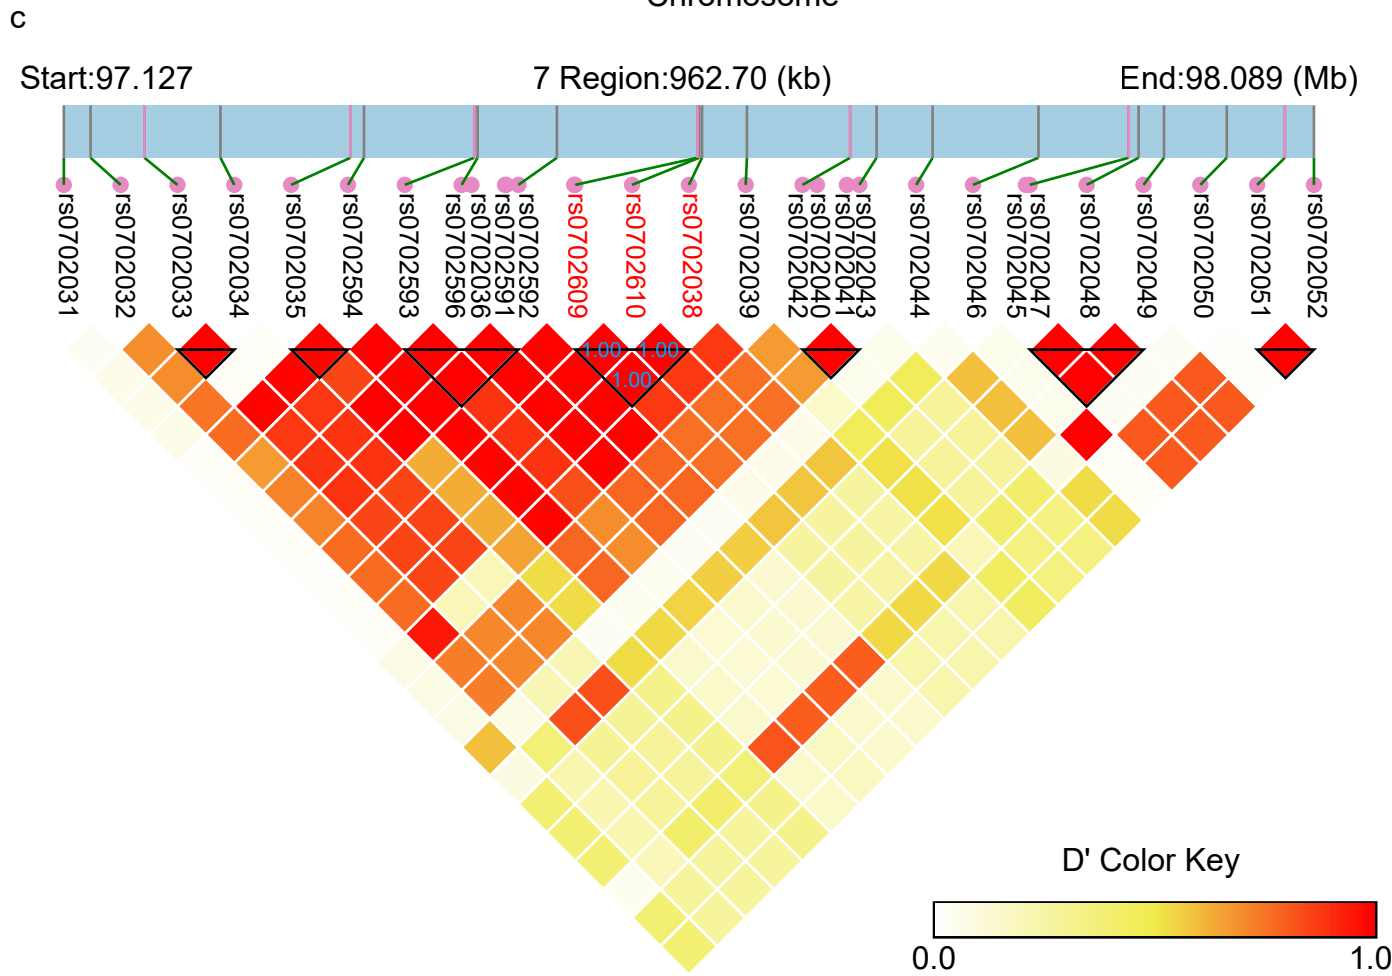

Supplement: 12711_2023_817_MOESM3_ESM.pdf [file 12711_2023_817_MOESM3_ESM.pdf]
